# Supplementary material for: CNV Analysis in Tourette Syndrome Implicates Large Genomic Rearrangements in COL8A1 and NRXN1
Source: PubMed Central journal article supplement (PMC3606459; doi:10.1371/journal.pone.0059061), 2013-03-22

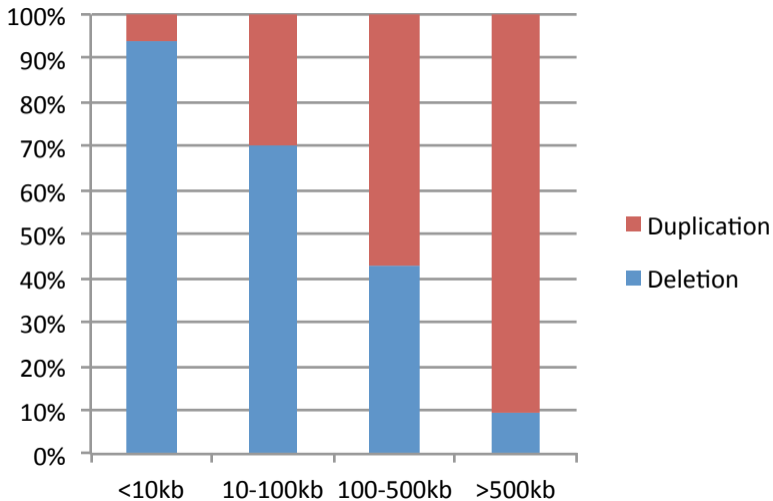

Supplement: pone.0059061.s003.pdf [file pone.0059061.s003.pdf]
